# Supplementary material for: Thiamine May Be Beneficial for Patients With Ventilator-Associated Pneumonia in the Intensive Care Unit: A Retrospective Study Based on the MIMIC-IV Database
Source: Front Pharmacol. 2022 Jun 23;13:898566. doi: 10.3389/fphar.2022.898566 (PMC9259950; doi:10.3389/fphar.2022.898566)
Supplement: Supplementary file 1 [file Table2.XLSX]

## Sheet: Sheet1
	PSM population			IPW population
	No thiamine group	Thiamine group	p-value	No thiamine group	Thiamine group	p-value
	453	453		1576	1382.6
Age	64.00 (53.00, 75.00)	62.00 (50.00, 71.00)	0.006	66.00 (55.00, 77.00)	63.00 (51.00, 71.00)	<0.001
Gender (%)			0.333
male	282 (62.3)	297 (65.6)		976.6 (62.0)	914.2 (66.1)	0.125
female	171 (37.7)	156 (34.4)		599.4 (38.0)	468.4 (33.9)
BMI	28.22 (24.41, 33.40)	27.70 (23.56, 33.49)	0.55	28.25 (24.35, 33.77)	28.07 (23.78, 33.65)	0.738
APSIII	68.00 (52.00, 88.00)	69.00 (49.00, 91.00)	0.864	67.00 (50.00, 88.00)	67.00 (48.49, 88.00)	0.792
Race (%)			0.152
White	276 (60.9)	248 (54.7)		939.9 (59.6)	776.5 (56.2)	0.287
Black	46 (10.2)	49 (10.8)		172.7 (11.0)	142.8 (10.3)
others	131 (28.9)	156 (34.4)		463.4 (29.4)	463.2 (33.5)
Admission type (%)			0.592
emergency	261 (57.6)	252 (55.6)		958.4 (60.8)	740.9 (53.6)	0.009
others	192 (42.4)	201 (44.4)		617.7 (39.2)	641.7 (46.4)
First careunit (%)			0.702
MICU/SICU	336 (74.2)	342 (75.5)		1181.4 (75.0)	1035.7 (74.9)	0.984
others	117 (25.8)	111 (24.5)		394.6 (25.0)	346.8 (25.1)
Vasopressor (%)			0.732
no	283 (62.5)	277 (61.1)		1181.4 (75.0)	1035.7 (74.9)	0.984
yes	170 (37.5)	176 (38.9)		394.6 (25.0)	346.8 (25.1)
CRRT (%)			0.49
no	438 (96.7)	433 (95.6)		1541.9 (97.8)	1334.7 (96.5)	0.103
yes	15 ( 3.3)	20 ( 4.4)		34.1 ( 2.2)	47.9 ( 3.5)
Duration of IMV(hour)	119.00 (48.00, 234.00)	165.00 (68.00, 294.00)	<0.001	119.32 (51.83, 236.00)	157.06 (64.00, 292.38)	0.001
Comorbidities
Sepsis (%)			0.338
no	24 ( 5.3)	17 ( 3.8)		91.6 ( 5.8)	60.0 ( 4.3)	0.259
yes	429 (94.7)	436 (96.2)		1484.5 (94.2)	1322.6 (95.7)
Myocardial infarct (%)			0.598
no	371 (81.9)	378 (83.4)		1281.3 (81.3)	1157.3 (83.7)	0.259
yes	82 (18.1)	75 (16.6)		294.7 (18.7)	225.3 (16.3)
Congestive heart failure (%)			0.886
no	314 (69.3)	311 (68.7)		1032.9 (65.5)	946.8 (68.5)	0.273
yes	139 (30.7)	142 (31.3)		543.1 (34.5)	435.7 (31.5)
Hypertension (%)			0.162
no	249 (55.0)	227 (50.1)		870.5 (55.2)	706.3 (51.1)	0.139
yes	204 (45.0)	226 (49.9)		705.6 (44.8)	676.2 (48.9)
Cerebrovascular disease (%)			0.308
no	340 (75.1)	354 (78.1)		1156.8 (73.4)	1069.7 (77.4)	0.112
yes	113 (24.9)	99 (21.9)		419.2 (26.6)	312.8 (22.6)
Chronic pulmonary disease (%)			0.336
no	319 (70.4)	333 (73.5)		1117.8 (70.9)	1008.1 (72.9)	0.433
yes	134 (29.6)	120 (26.5)		458.2 (29.1)	374.5 (27.1)
Liver disease (%)			0.596
no	331 (73.1)	339 (74.8)		1339.4 (85.0)	1095.7 (79.3)	0.004
yes	122 (26.9)	114 (25.2)		236.6 (15.0)	286.8 (20.7)
Renal disease (%)			0.063
no	343 (75.7)	367 (81.0)		1200.5 (76.2)	1114.2 (80.6)	0.063
yes	110 (24.3)	86 (19.0)		375.5 (23.8)	268.4 (19.4)
Diabetes (%)			0.77
no	319 (70.4)	324 (71.5)		1066.8 (67.7)	994.9 (72.0)	0.1
yes	134 (29.6)	129 (28.5)		509.2 (32.3)	387.7 (28.0)
Malignant cancer (%)			0.327
no	401 (88.5)	411 (90.7)		1402.4 (89.0)	1261.1 (91.2)	0.192
yes	52 (11.5)	42 ( 9.3)		173.6 (11.0)	121.5 ( 8.8)
Vital signs
Mbp(mmhg)	58.00 (51.00, 65.00)	59.00 (52.00, 66.00)	0.152	58.00 (51.00, 65.00)	59.00 (52.00, 66.00)	0.198
Heart rate(-min)	71.00 (61.00, 84.00)	73.00 (61.00, 85.00)	0.429	70.00 (60.00, 82.00)	71.00 (60.00, 84.00)	0.172
Respiratory rate(-min)	13.00 (10.00, 16.00)	13.00 (10.00, 16.00)	0.773	13.00 (10.00, 15.60)	13.00 (10.00, 15.00)	0.334
SpO2(%)	93.00 (89.00, 96.00)	93.00 (90.00, 95.00)	0.775	93.00 (90.00, 96.00)	93.00 (90.00, 95.00)	0.558
Temperature(℃)	37.56 (37.11, 38.20)	37.62 (37.11, 38.22)	0.508	37.61 (37.11, 38.20)	37.67 (37.17, 38.22)	0.32
Laboratory tests
WBC(k/uL)	12.20 (8.50, 17.00)	11.70 (8.20, 16.20)	0.196	11.90 (8.70, 16.30)	11.80 (8.42, 16.36)	0.544
Lymphocytes(%)	9.30 (5.40, 15.20)	9.30 (5.80, 14.90)	0.901	9.20 (5.60, 14.60)	9.30 (5.80, 14.60)	0.78
Neutrophils(%)	81.70 (74.30, 87.30)	79.70 (72.00, 85.70)	0.016	81.24 (74.50, 86.60)	80.00 (73.00, 85.76)	0.051
Hemoglobin(g/dl)	10.50 (8.80, 12.50)	10.70 (9.00, 12.60)	0.323	10.50 (8.90, 12.32)	10.80 (9.00, 12.63)	0.179
Platelet(k/uL)	199.00 (140.00, 275.00)	187.00 (123.00, 247.00)	0.008	196.00 (140.00, 263.00)	194.00 (133.00, 254.00)	0.258
RDW(%)	14.80 (13.60, 16.30)	14.60 (13.50, 16.60)	0.573	14.60 (13.51, 16.20)	14.60 (13.50, 16.40)	0.725
Anion Gap	15.00 (12.00, 18.00)	15.00 (13.00, 19.00)	0.027	14.00 (12.00, 17.00)	15.00 (12.00, 18.00)	0.183
Lactate(g/dl)	1.70 (1.10, 2.80)	1.70 (1.10, 3.10)	0.677	1.60 (1.10, 2.60)	1.60 (1.10, 2.70)	0.815
PaCO2(mmhg)	42.00 (36.00, 51.00)	41.00 (34.00, 49.00)	0.053	41.00 (36.00, 50.00)	41.00 (35.00, 49.00)	0.36
PaO2(mmhg)	109.00 (67.00, 201.00)	103.00 (62.00, 185.00)	0.204	107.00 (69.93, 196.68)	104.62 (65.00, 187.00)	0.273
INR	1.30 (1.10, 1.50)	1.20 (1.10, 1.50)	0.219	1.30 (1.10, 1.50)	1.20 (1.10, 1.50)	0.259
PTT(s)	31.20 (27.40, 38.30)	30.60 (26.90, 37.30)	0.148	30.60 (26.90, 38.00)	30.40 (26.70, 37.03)	0.339
AST(IU/L)	42.00 (27.00, 86.00)	49.00 (27.00, 110.00)	0.222	40.00 (25.92, 82.00)	44.86 (26.00, 95.13)	0.199
ALT(IU/L)	31.00 (17.00, 62.00)	29.00 (18.00, 63.00)	0.734	29.00 (16.00, 57.27)	29.00 (17.00, 59.29)	0.727
Bilirubin, total(mg/dL)	0.60 (0.40, 1.10)	0.70 (0.40, 1.40)	0.012	0.60 (0.30, 1.00)	0.60 (0.40, 1.20)	0.058
Albumin(g/dl)	2.90 (2.50, 3.30)	2.90 (2.50, 3.30)	0.797	2.90 (2.50, 3.40)	2.90 (2.51, 3.30)	0.931
Glucose(mg/dl)	139.00 (110.00, 183.00)	137.00 (110.00, 181.00)	0.243	137.00 (110.00, 178.00)	137.07 (110.00, 181.00)	0.474
Creatinine(g/dl)	1.10 (0.80, 1.60)	1.00 (0.70, 1.80)	0.617	1.00 (0.80, 1.60)	1.00 (0.70, 1.60)	0.649
Urine output(ml)	1500.00 (947.00, 2335.00)	1410.00 (825.00, 2260.00)	0.116	1539.37 (922.08, 2320.82)	1468.77 (860.00, 2338.49)	0.322
